# Supplementary material for: Conservation and Sex-Specific Splicing of the transformer Gene in the Calliphorids Cochliomyia hominivorax, Cochliomyia macellaria and Lucilia sericata
Source: PubMed Central journal article supplement (PMC3567074; doi:10.1371/journal.pone.0056303), 2013-02-07
Supplement: pone.0056303.s001.pdf [file pone.0056303.s001.pdf]

Cmtra MDSNITGLSASSTLGGPKFKIHQSIIPSGSVKRGPHAIVRSELNDNCIEIQRRCEGEGSIPL  
Cmtra MDSNITGLSASSTLGGPKFKIHQSIIPSGSVKRGPHAIVRSELNDNCIEIQRRCEGEGSIPL  
Lstra MDSIATGLAASSTLEGTGFKIQQSIIPSGSIKRGPHAIVRTADLNDGINIQRRFEGESKPL  
Lctra MDSITTLAASSILEGTGFKIQQSIIPSGSIKRGPHAIVRTADLNDGINIQRRFEGESKPL  
\*\*\* \*\*:\*:\* \* \*,\*:\*:\*:\*:\*:\*:\*:\*:\*:\*:\*:\*:\*:\*:\*:\*:\*:\* \* :\*:\* \* \* \* \* \*

Cmtra FDRHDITVNQTINESNDKQ-INHEHHTSGKT-KTNRSSSRESSSPERYRHRDIKHHSSIT  
Cmtra FDRHDITVNQTINESNDKK-TNHEHHTGGKS-KTNRSSSRESSSPERYRHRDIKHHSSS  
Lstra FDRDDIAVNQTTLDARDTNNDHERNTGCKT-KTNRSSSSTVSSSPERYRHRDIKHHSS-  
Lctra FDRDDIAVNQTTLDARDTNNDHERNTGCKTNTKTNRRSSSSTESSSPERYRHRDIKHHSS-  
\*\*\*.\*:\*:\*:\* \* :\*.\*.\* :\*:\*:\*.\*.\* :\*\*\*\*\* \*\*\*\*\*

Cmtra SMSRRRKTPERTVRSERPSNNRDHHSYNLKHG-SNTKTDKYSRKDKSKTRTPSPNK-KKP  
Cmtra SMSGRRKTPERTARSERPNNNRDHHSYNLKCSSSNTKTDKYSRKDKRSKSRTPSPNK-KKP  
Lstra PTSGRRKTPERSGRNERPTHSHDKHNYNVKSN--NTMTDKYKRSRRSKRSRPPHNANKKT  
Lctra PTSGRRKTPERSGRSERPTHSHDKHNYNVKSN--NTMTDKYKRSRRSKRSRPPHNANKKT  
. \* \*\*\*\*\*: \*.\*.\*.\*:\*:\*:\*:\*.\* \*\* \*\*\*\*\* \*.\*:\*:\*.\* \* \*\*

Cmtra GEKVPYYRDEQREKDRLLKRLYGRSRSRSPPTSRSS-SGRKYSPI TKRRIESP--RRRRSR  
Cmtra VEKVPYYRDEQREKDRLLKRLHGRSRSRSPPTSRSS-SARKYSPATKRRIESP--RRRRSR  
Lstra VEKVPYYRDEQREKDRIRRLYGRSRSRSTPP-----AAATLSSSTKRRIESPTRRRRRST  
Lctra VEKVPYYRDEQREKDRIRRLYGRSRSRSTPPPPVGNLSSSSSSSTAKRRIESPSRRRRRST  
\*\*\*\*\*:\*:\*:\*:\* \*.\*:\* \* :\*. \*.\*:\*:\*:\* \* :\*\*\*\*\* \*\*\*\*\*

Cmtra SKDRYRKYSFH--RSSRKYDRTHRSSRSRSRSTRSPSRRERHKHYSRSSRERDKEHKED  
Cmtra SRDRHRKYSFH--RSSRKYDRTHRSSRSRSRSTRSPSRRERHKHYSRSSRERDKEHKED  
Lstra SRER--RRHSPY-HRNVRRDYR---SRRSRTSRSTRSPPRERYKHSSRSSRERDNEHKED  
Lctra SRDRHRHRSPIIHRVRRDYR---SRRSRTSRSTRSPPRRERHKHYSRSSRERDKEHKED  
\*:\*.\*:\*:\*:\* \*.\*:\* \* \* \*:\*:\*:\*:\* \* \* \*:\*:\* \* \* \*:\*:\*:\*:\* \* \* \* \*

Cmtra VNNRSTAILPPTPQFI-LPVAVPADY---AAAAYTFPGWTTAPQLAWHPGHHRPP---AAA  
Cmtra ANNRTAILPPTPQFI-LPVAVPADYAAAAAYSFPGWTAAPQLAWHPGHHRPPA---AAA  
Lstra ANSLTTAIIIPATPQIIPVVPVPAEY---AAAYTFPGWT-APQPTWPPSHRPPSASHFA  
Lctra VNSLTTAIIIPATPQIIPVVPVPAEY---AAAYTFPGWT-APQPTWPPSHRPPATSHFA  
. \* . \*:\*:\*.\*:\*:\* \*.\*:\*:\* \* \* \*:\*:\*:\* \* \* \* \* \* \* \* \* \* \* \*

Cmtra PFPMPVMPALRPPHQAASYAGLPP-ALAYPPIITSPYRPHIPQRYPPPRHNTNN-YHSRP  
Cmtra PFPMPVMPALRPPPHQAASYAGLPP-ALAYPPIITPYRPHIPQRYPPPRHNTNS-YHSRP  
Lstra PFPMPWTMPLRPPPHQAASYGGLPPALAYPMAASYPHAPQRYPPRHDNSN-YQTRP  
Lctra PFPMPWMPPLRPPPHQAASYGGLPPPTLAYPMTASYRPHGQRYPPRHSNNNYQTRP  
\*\*\*\* \*.\*:\*.\*:\*:\* \*.\*:\*:\* \* \* \*:\*:\*:\* \* \* \* \* \* \* \* \* \* \* \* \* \*

Cmtra KKPTS  
Cmtra KKPTS  
Lstra KKPPS  
Lctra KKPPS  
\*\*\*.\*
