# Supplementary material for: Conservation and Sex-Specific Splicing of the transformer Gene in the Calliphorids Cochliomyia hominivorax, Cochliomyia macellaria and Lucilia sericata
Source: PubMed Central journal article supplement (PMC3567074; doi:10.1371/journal.pone.0056303), 2013-02-07
Supplement: pone.0056303.s003.pdf [file pone.0056303.s003.pdf]

Table S1. MEME motifs in male exons

| Motif 1 |       |          |             |                       |             |
|---------|-------|----------|-------------|-----------------------|-------------|
| Species | Start | P-value  | 5' Flanking | MEME Motif            | 3' Flanking |
| Lc      | 230   | 5.55e-11 | TATGAGACTT  | CTTCAATCAACATAACCATTT | TTTGGAGAAA  |
| Ls      | 240   | 5.55e-11 | GATGGGACTT  | CTTCAATCAACATAACCATTT | TTTTGGGAGA  |
| Cm      | 224   | 1.18e-10 | GAGGAGGAAA  | CTACAATCAACATACTATTT  | CTTGGTTTGA  |
| Ch      | 220   | 1.87e-10 | GAGGAACAAA  | CTACAATCAACATACTATGT  | CTTGGTTTGA  |
| Motif 2 |       |          |             |                       |             |
| Species | Start | P-value  | 5' Flanking | MEME Motif            | 3' Flanking |
| Ch      | 30    | 2.35e-09 | TCAAGTGTTA  | CGGCTCCATTTTTCTTT     | AGATATTTCC  |
| Cm      | 30    | 5.59e-09 | ACAAGAGTTA  | TGGCTCCATTTTTCTTT     | AGATATTTCC  |
| Lc      | 29    | 1.41e-08 | CCAAACCTAA  | TTGCAGCAGATTTTCTTT    | TATTATTTCA  |
| Ls      | 31    | 1.12e-07 | AACCTTATTG  | CTGCAGTAGTTTTCTTT     | TCGTTTAGTT  |
| Motif 3 |       |          |             |                       |             |
| Species | Start | P-value  | 5' Flanking | MEME Motif            | 3' Flanking |
| Lc      | 96    | 3.23e-08 | ATTAGTCAAT  | TTGGGATTTAGTTG        | AAAAAACTT   |
| Ls      | 104   | 3.23e-08 | ATTAGTCAAT  | TTGGGATTTAGTTG        | AAAAAAAAG   |
| Ch      | 109   | 1.01e-07 | AAGCATACTG  | TTGGGATTTAAATG        | ATTTTTTTAT  |
| Cm      | 111   | 1.86e-07 | AAAAACATTC  | TTGGGATCTAAATG        | ATTTACTTTA  |
| Motif 4 |       |          |             |                       |             |
| Species | Start | P-value  | 5' Flanking | MEME Motif            | 3' Flanking |
| Ch      | 269   | 2.44e-10 | TGTGACATAT  | TGGGCAGTTAAAACAAGACT  | ATAAC       |
| Cm      | 273   | 1.30e-09 | TATGACGTAT  | TGGGCAGTTAAGACAAGGCT  | ATAAC       |
| Lc      | 6     | 4.58e-08 | GTAAT       | TTTCCTTTTAAAACCAAACC  | TAATTGCAGC  |
| Ls      | 5     | 4.58e-08 | GTAA        | TTTCCTTTTAAAACCAAACC  | TTATTGCTGC  |
| Motif 5 |       |          |             |                       |             |
| Species | Start | P-value  | 5' Flanking | MEME Motif            | 3' Flanking |
| Ch      | 199   | 1.73e-08 | TGAAAACGTT  | GCATTTTCCAAGAGGA      | ACAAACTACA  |
| Ls      | 187   | 2.86e-08 | TTGAGTACCA  | TCAATTTCTGATGGC       | AAAGTGGAAA  |
| Cm      | 203   | 3.99e-08 | TGAAAACATT  | GCATTCTCCAAGAGGA      | GGAAACTACA  |
| Lc      | 176   | 6.48e-08 | TCGAATGGCA  | TCAATTCCTGATGGC       | AAAGTGCATA  |
| Motif 6 |       |          |             |                       |             |
| Species | Start | P-value  | 5' Flanking | MEME Motif            | 3' Flanking |
| Lc      | 265   | 4.10e-09 | AGAAAACCTAA | GGATGCAATCATTGGCGG    | TTAAAAAATC  |
| Ls      | 274   | 6.61e-09 | GGGAGACCAA  | GGATACAATCAATTGGCGG   | CAAAAGGCAA  |
| Cm      | 252   | 3.97e-08 | TTCTTGGTTT  | GAGGAAGAAGTTATGACGT   | ATTGGGCAGT  |
| Ch      | 248   | 1.69e-06 | GTCTTGGTTT  | GAAGAAGAAGTTGTGACAT   | ATTGGGCAGT  |
| Motif 7 |       |          |             |                       |             |
| Species | Start | P-value  | 5' Flanking | MEME Motif            | 3' Flanking |
| Ls      | 206   | 3.46e-09 | TGATGGCAAA  | GTGGAAAAATAGCTTGTCT   | TAAAGATGGG  |
| Ch      | 170   | 4.57e-08 | AGTTTAAATA  | ATGGCAAAAGAAAATATACT  | GAAAACGTTG  |
| Lc      | 195   | 1.19e-07 | TGATGGCAAA  | GTGCATAAATAGCTTGTCT   | TGAAATATGA  |
| Cm      | 174   | 5.39e-07 | AGTTTAAATA  | ATGACAAAAGAAAAATGCT   | GAAAACATTG  |
| Motif 8 |       |          |             |                       |             |
| Species | Start | P-value  | 5' Flanking | MEME Motif            | 3' Flanking |
| Ls      | 49    | 1.18e-06 | GTTTTCTTTT  | CGTTTAGTTTGT          | TACAATATTC  |

|    |    |          |            |               |            |
|----|----|----------|------------|---------------|------------|
| Ch | 57 | 1.74e-06 | AGATATTTCC | AGTATAGTTTTTT | ATTACCAACA |
| Cm | 57 | 3.38e-06 | AGATATTTCC | AGTATAGTTCTTT | TATTATCAAC |
| Lc | 54 | 1.04e-05 | TTTATTATTT | CATTTAGTTTTTT | TATAATACAA |

Motif 9

| Species | Start | P-value  | 5' Flanking | MEME Motif | 3' Flanking |
|---------|-------|----------|-------------|------------|-------------|
| Ch      | 136   | 1.10e-05 | TTTTTATTAA  | AAAGTGAGAC | AAAATTTTCA  |
| Ls      | 228   | 1.33e-05 | CTTGCCTTA   | AAGATGGGAC | TTCTTCAATC  |
| Lc      | 218   | 1.60e-05 | TTGTTCTTGA  | AATATGAGAC | TTCTTCAATC  |
| Cm      | 141   | 5.96e-05 | TTTATTTAAA  | AAAATGAAAC | ACATTTTGAA  |

Motif 10

| Species | Start | P-value  | 5' Flanking | MEME Motif           | 3' Flanking |
|---------|-------|----------|-------------|----------------------|-------------|
| Lc      | 155   | 5.85e-09 | GCTACTTTTA  | AAGCTAAATATTCGAATGGC | ATCAATTCCC  |
| Ls      | 166   | 1.30e-08 | AACAACATTT  | AAGCTAAATATTTGAGTACC | ATCAATTCC   |
| Cm      | 87    | 2.85e-06 | AACAAGTTAA  | AAGATAATTTTTTAAAAAC  | ATTCTTGGGA  |
| Ch      | 84    | 7.08e-06 | CCAACATTTA  | AAAACAAATTTTAGAAAGCA | TACTGTTGGG  |

Motif 11

| Species | Start | P-value  | 5' Flanking | MEME Motif     | 3' Flanking |
|---------|-------|----------|-------------|----------------|-------------|
| Lc      | 82    | 8.00e-06 | TACAATTTAA  | ATTTATTAGTCAAT | TTGGGATTTA  |
| Cm      | 153   | 8.00e-06 | AATGAAACAC  | ATTTTGAATACAGT | TTTAATAATG  |
| Ls      | 90    | 8.00e-06 | TACAATAACA  | ATTTATTAGTCAAT | TTGGGATTTA  |
| Ch      | 149   | 8.85e-06 | GTGAGACAAA  | ATTTTCAATACAGT | TTTAATAATG  |

Motif 12

| Species | Start | P-value  | 5' Flanking | MEME Motif    | 3' Flanking |
|---------|-------|----------|-------------|---------------|-------------|
| Ls      | 305   | 6.45e-06 | AAAGGCAATA  | AAGGCTCTTA    | AGAG        |
| Lc      | 299   | 3.54e-05 | AAATCTTTAA  | AGGGCCCTTA    | AG          |
| Cm      | 3     | 1.60e-04 |             | GT AATTTTCTTA | ACATATAACA  |
| Ch      | 3     | 5.13e-04 |             | GT AATTTTCTTT | ACGTATATCA  |

Motif 13

| Species | Start | P-value  | 5' Flanking | MEME Motif | 3' Flanking |
|---------|-------|----------|-------------|------------|-------------|
| Ch      | 70    | 1.00e-05 | ATAGTTTTTT  | ATTACCAACA | TTTAAAAACA  |
| Ls      | 74    | 4.37e-05 | CAATATTCTA  | TTTACCTACA | ATAACAATTT  |
| Cm      | 71    | 7.37e-05 | TAGTTCTTTT  | ATTATCAACA | AGTTAAAAGA  |
| Lc      | 141   | 3.45e-04 | AAATGAAATG  | ATAAGCTACT | TTTAAAGCTA  |

Motif 14

| Species | Start | P-value  | 5' Flanking | MEME Motif  | 3' Flanking |
|---------|-------|----------|-------------|-------------|-------------|
| Ls      | 264   | 2.29e-05 | CCATTTTTTT  | GGGAGACCAA  | GGATACAATC  |
| Cm      | 14    | 1.87e-04 | ATTTTCTTAA  | CATATAACAA  | GAGTTATGGC  |
| Ch      | 14    | 2.09e-04 | ATTTTCTTTA  | CGTATATCAA  | GTGTTACGGC  |
| Lc      | 254   | 3.45e-04 | CCATTTTTTG  | GAGAAAACCTA | AGGATGCAAT  |

Motif 15

| Species | Start | P-value  | 5' Flanking | MEME Motif | 3' Flanking |
|---------|-------|----------|-------------|------------|-------------|
| Cm      | 47    | 3.10e-05 | ATTTTCTTTT  | AGATATTTCC | AGTATAGTTT  |
| Ch      | 47    | 3.10e-05 | ATTTTCTTTT  | AGATATTTCC | AGTATAGTTT  |
| Ls      | 131   | 2.16e-04 | AAAAAAGTAC  | AAAAAATTCA | TAAATTAATA  |
| Lc      | 122   | 3.70e-03 | AAAAACTTAA  | AAAAAATTAA | AATGAAATGA  |

Motif 16

| Species | Start | P-value  | 5' Flanking | MEME Motif | 3' Flanking |
|---------|-------|----------|-------------|------------|-------------|
| Cm      | 126   | 4.91e-04 | ATCTAAATGA  | TTTACTTTAT | TTAAAAAAT   |
| Lc      | 289   | 1.68e-03 | GGCGGTAAA   | AAATCTTTAA | AGGGCCCTTA  |
| Ls      | 154   | 7.20e-03 | ATTA AAAAGT | TAAACAACAT | TTAAGCTAAA  |
| Ch      | 123   | 1.45e-02 | GATTTAAATG  | ATTTTTTTAT | TAAAAAGTGA  |

#### Motif 17

| Species | Start | P-value  | 5' Flanking | MEME Motif | 3' Flanking |
|---------|-------|----------|-------------|------------|-------------|
| Cm      | 1     | 4.81e-04 | .           | GTAATTTTCT | TAACATATAA  |
| Ch      | 1     | 4.81e-04 | .           | GTAATTTTCT | TTACGTATAT  |
| Ls      | 293   | 1.18e-02 | CAATTGGCGG  | CAAAAGGCAA | TAAAGGCTCT  |
| Lc      | 110   | 1.61e-02 | GATTTAGTTG  | AAAAAACTT  | AAAAAAAATT  |

#### Motif 18

| Species | Start | P-value  | 5' Flanking | MEME Motif | 3' Flanking |
|---------|-------|----------|-------------|------------|-------------|
| Cm      | 1     | 2.57e-04 | .           | GTAATTTTCT | TAACATATAA  |
| Ch      | 1     | 2.57e-04 | .           | GTAATTTTCT | TTACGTATAT  |
| Ls      | 62    | 9.91e-03 | TTAGTTTGTT  | TACAATATTC | TATTTACCTA  |
| Lc      | 72    | 1.20e-02 | TTTTTTATAA  | TACAATATAA | ATTTATTAGT  |

#### Motif 19

| Species | Start | P-value  | 5' Flanking | MEME Motif | 3' Flanking |
|---------|-------|----------|-------------|------------|-------------|
| Cm      | 1     | 2.64e-05 | .           | GTAATTTTCT | TAACATATAA  |
| Ch      | 1     | 2.64e-05 | .           | GTAATTTTCT | TTACGTATAT  |
| Lc      | 1     | 2.94e-05 | .           | GTAATTTTCC | TTTTAAAACC  |
| Ls      | 118   | 1.58e-01 | GATTTAGTTG  | AAAAAAAAG  | TACAAAAAAT  |

#### Motif 20

| Species | Start | P-value  | 5' Flanking | MEME Motif  | 3' Flanking |
|---------|-------|----------|-------------|-------------|-------------|
| Cm      | 1     | 2.34e-05 | .           | GTAATTTTCT  | TAACATATAA  |
| Ch      | 1     | 2.34e-05 | .           | GTAATTTTCT  | TTACGTATAT  |
| Lc      | 1     | 2.84e-05 | .           | GTAATTTTCC  | TTTTAAAACC  |
| Ls      | 142   | 1.96e-01 | AAAAATTCAT  | AAATTA AAAA | GTAAACAAC   |
