# Supplementary material for: Conservation and Sex-Specific Splicing of the transformer Gene in the Calliphorids Cochliomyia hominivorax, Cochliomyia macellaria and Lucilia sericata
Source: PubMed Central journal article supplement (PMC3567074; doi:10.1371/journal.pone.0056303), 2013-02-07
Supplement: pone.0056303.s004.pdf [file pone.0056303.s004.pdf]

Table S2. MEME motifs in male introns.

| Motif 1 |       |          |             |                 |             |
|---------|-------|----------|-------------|-----------------|-------------|
| Species | Start | P-value  | 5' Flanking | MEME Motif      | 3' Flanking |
| Lc      | 1997  | 3.06e-09 | AAATGTTTCT  | CTCAACAATCAACAT | ACCAAAATTG  |
| Cm      | 2431  | 3.06e-09 | AAAAATAAAA  | CTCAACAATCAACAT | ACCAAAATTT  |
| Ls      | 1619  | 3.06e-09 | AAATGTTTCT  | CTCAACAATCAACAT | ACCAAAATTG  |
| Ch      | 2092  | 3.06e-09 | ATAATAAAAG  | CTCAACAATCAACAT | ACTAACATTT  |
| Motif 2 |       |          |             |                 |             |
| Species | Start | P-value  | 5' Flanking | MEME Motif      | 3' Flanking |
| Lc      | 1788  | 3.18e-09 | TAAAACAATC  | AACAATCAACATACC | AAAGTTTTGA  |
| Cm      | 2631  | 3.18e-09 | AAAAATCAAC  | AACAATCAACATACC | ATAATTGAAA  |
| Ls      | 1418  | 3.18e-09 | TAAAACAATC  | AACAATCAACATACC | AAATTTTGAA  |
| Ch      | 2290  | 3.18e-09 | TAAAATAAAC  | AACAATCAACATACC | ATAATTGAAG  |
| Motif 3 |       |          |             |                 |             |
| Species | Start | P-value  | 5' Flanking | MEME Motif      | 3' Flanking |
| Ch      | 1094  | 1.41e-10 | TCTCTACTGG  | CCTTAGCTCCGGGC  | TTTTTGGAGA  |
| Lc      | 1013  | 2.05e-09 | CAGATGTAAA  | CCTTACCTCTGGGA  | GAGTATTGAG  |
| Cm      | 1876  | 4.58e-09 | CTCTCCACAG  | CCTTAACTCTGGGC  | AGTGGAATAT  |
| Ls      | 828   | 7.90e-08 | ACTGAATTAT  | CCATGCCTGCCGTA  | CTATCTATCT  |
| Motif 4 |       |          |             |                 |             |
| Species | Start | P-value  | 5' Flanking | MEME Motif      | 3' Flanking |
| Ch      | 2160  | 1.10e-09 | TTATAATTAA  | CGACAATCAACATAC | CATAGAAAAA  |
| Lc      | 1864  | 4.28e-09 | TTCAATTTAA  | CAACAATCAACATAC | TATTTAATGA  |
| Ls      | 1490  | 4.28e-09 | TTTTCTTAAA  | CAACAATCAACATAC | TATTTATTAA  |
| Cm      | 2500  | 7.35e-09 | CTATAATTAT  | CTACAATCAACATAC | CAAATAAAAA  |
| Motif 5 |       |          |             |                 |             |
| Species | Start | P-value  | 5' Flanking | MEME Motif      | 3' Flanking |
| Lc      | 1908  | 7.29e-09 | CGTCAACAAA  | ACTACAATCAACATT | ACCTTAACTC  |
| Cm      | 2551  | 7.29e-09 | TGAACACCAA  | ACTACAATCAACATT | TCCCTCAAGG  |
| Ls      | 1534  | 7.29e-09 | CATCAACAAA  | ACTACAATCAACATT | ACCTAAACCC  |
| Ch      | 2209  | 7.29e-09 | TGAATACAAA  | ACTACAATCAACATT | TTCCTCAGGG  |
| Motif 6 |       |          |             |                 |             |
| Species | Start | P-value  | 5' Flanking | MEME Motif      | 3' Flanking |
| Ch      | 2244  | 7.09e-10 | CAACACACAT  | CTAGGTTTTGCAAGG | ATCAACAAAT  |
| Lc      | 220   | 1.57e-09 | CCAGCACAAA  | CTGGTTTTTGTAAGG | AATATAGACT  |
| Cm      | 2584  | 3.95e-09 | GGCAACACAC  | CAAGGTTTTGCAAGG | ATCAACAAAC  |
| Ls      | 855   | 1.96e-08 | TCTATCTAAA  | CTGATTTTCGTAAGG | AATATCGACT  |
| Motif 7 |       |          |             |                 |             |
| Species | Start | P-value  | 5' Flanking | MEME Motif      | 3' Flanking |
| Cm      | 4022  | 7.23e-08 | TAATTTAAAA  | GGATCCAGGG      | TTACATGTAT  |
| Lc      | 2353  | 2.01e-07 | GAATATGTTT  | GTTTCCAGGG      | ATAATTATTA  |
| Ls      | 2014  | 2.01e-07 | AAATATGTTT  | GTTTCCAGGG      | ATAATTATTA  |
| Ch      | 2631  | 1.44e-06 | GATTTTAAAA  | GGATCGAGGT      | TGCATGTATG  |
| Motif 8 |       |          |             |                 |             |
| Species | Start | P-value  | 5' Flanking | MEME Motif      | 3' Flanking |
| Lc      | 2321  | 6.85e-09 | TTATTATCAA  | CTTTAGCAACATAC  | AAAAAATGA   |

|    |      |          |            |                |            |
|----|------|----------|------------|----------------|------------|
| Ls | 1985 | 6.85e-09 | TTATTATCAA | CTTTAGCAACATAC | GAAAAAATA  |
| Cm | 3983 | 2.59e-08 | AATTAATCAT | CTTTATCAACATAC | AAAATGATAG |
| Ch | 2594 | 2.59e-08 | AATTAATCAT | CTTTATCAACATAC | AAAATGATAG |

Motif 9

| Species | Start | P-value  | 5' Flanking | MEME Motif     | 3' Flanking |
|---------|-------|----------|-------------|----------------|-------------|
| Ls      | 1563  | 5.40e-09 | AAACCCAACA  | GCAACATGGCAACA | AAATACAAAA  |
| Ch      | 2225  | 5.76e-09 | ATCAACATTT  | TCCTCAGGGCAACA | CACATCTAGG  |
| Cm      | 2567  | 7.33e-09 | ATCAACATTT  | CCCTCAAGGCAACA | CACCAAGGTT  |
| Lc      | 1937  | 3.79e-08 | TAACTCGGCA  | GCAATATGGCAACA | AAAAGTACAA  |

Motif 10

| Species | Start | P-value  | 5' Flanking | MEME Motif       | 3' Flanking |
|---------|-------|----------|-------------|------------------|-------------|
| Lc      | 1758  | 4.28e-09 | GTTTTAAGTA  | TAATGAATTTTCAGTG | AAATATAAAA  |
| Cm      | 2406  | 4.28e-09 | TAGTTAAGTT  | TAATGAATTTTCAGTG | AAAAATAAAA  |
| Ch      | 2066  | 4.28e-09 | TAGTTAAGAT  | TAATGAATTTTCAGTG | AATAATAAAA  |
| Ls      | 1388  | 3.26e-08 | AAGTTAAGTA  | TAATGATTTTCAGTA  | AAATATAAAA  |

Motif 11

| Species | Start | P-value  | 5' Flanking | MEME Motif | 3' Flanking |
|---------|-------|----------|-------------|------------|-------------|
| Ch      | 926   | 3.66e-08 | CGTTCCTCGA  | GGGGCGGTCA | TAATATTTTT  |
| Cm      | 470   | 3.06e-07 | TTCTAGAGAT  | GGCGCAGTCA | ATAACGAGAC  |
| Lc      | 1134  | 8.40e-07 | ATTAAGCGCT  | GTGGGCGCCA | TATTTCTTGC  |
| Ls      | 985   | 1.08e-06 | GACTGACGTT  | GTCGGAGTCA | ATTCACGTTG  |

Motif 12

| Species | Start | P-value  | 5' Flanking | MEME Motif      | 3' Flanking |
|---------|-------|----------|-------------|-----------------|-------------|
| Cm      | 380   | 2.28e-10 | CATAGATCTT  | CTGGAGTAAGAGTGG | TAGCTTCGCT  |
| Ch      | 223   | 2.28e-10 | CCTGGATCTT  | CTGGAGTAAGAGTGG | TAGGATTGGC  |
| Lc      | 732   | 4.29e-08 | CATAAATGTG  | CAGGAATCAGAGTAC | GTAATTCTAA  |
| Ls      | 757   | 7.72e-08 | TAAGTTAGAA  | ATGTCTGAGAGTTC  | CACGATATTT  |

Motif 13

| Species | Start | P-value  | 5' Flanking | MEME Motif     | 3' Flanking |
|---------|-------|----------|-------------|----------------|-------------|
| Cm      | 517   | 6.70e-10 | GCCTCTATCA  | CGAGTGTAGTGTGC | TAGAACTACC  |
| Lc      | 290   | 5.28e-09 | ACATCAAATC  | CGCCTGTTGTGCGC | TCCTTATCAT  |
| Ls      | 875   | 7.87e-08 | TAAGGAATAT  | CGACTGAAGTCGGT | AGAATATTCA  |
| Ch      | 325   | 1.08e-07 | ACGGTCAATA  | CGAGACTAGTATGC | ATCGAGACTA  |

Motif 14

| Species | Start | P-value  | 5' Flanking | MEME Motif      | 3' Flanking |
|---------|-------|----------|-------------|-----------------|-------------|
| Lc      | 1807  | 1.85e-09 | CATACCAAAG  | TTTTGAAGACCAGGG | TAAAGTTTTT  |
| Cm      | 2453  | 5.65e-09 | CATACCAAAA  | TTTTGAAGATCAGCA | ATATTAATCT  |
| Ch      | 2114  | 5.65e-09 | CATACTAACA  | TTTTGAAGATCAGCA | ATATTAATCT  |
| Ls      | 1436  | 4.32e-08 | ACATACCAAA  | TTTTGAAGATTCCGG | CAAAGTTTTT  |

Motif 15

| Species | Start | P-value  | 5' Flanking | MEME Motif     | 3' Flanking |
|---------|-------|----------|-------------|----------------|-------------|
| Lc      | 1892  | 1.42e-08 | TTAATGAAAT  | GGACAACGTCAACA | AAACTACAAT  |
| Ls      | 1518  | 1.42e-08 | TTATTAATAA  | GGACAACATCAACA | AAACTACAAT  |
| Ch      | 308   | 6.93e-08 | CAAATATTAG  | GGACGGCACGGTCA | ATACGAGACT  |
| Cm      | 2824  | 1.50e-07 | TAGTAGAGAA  | GGAAATCATCCACA | TAAAAAATT   |

Motif 16

| Species | Start | P-value  | 5' Flanking | MEME Motif | 3' Flanking |
|---------|-------|----------|-------------|------------|-------------|
| Lc      | 520   | 1.04e-07 | TACATCTGAA  | TCCGCGCGTC | CAATTTTGCA  |
| Ch      | 705   | 2.06e-07 | AGAAAAATAG  | TCCGCTCCCC | TACTTGATGC  |
| Ls      | 310   | 1.55e-06 | AAACAAATTT  | TCCGCTAGAC | TATAGATACA  |
| Cm      | 1022  | 4.69e-06 | ATGTAGTTTT  | TCTGCTCGTT | CTTCAAGCCA  |

#### Motif 17

| Species | Start | P-value  | 5' Flanking | MEME Motif       | 3' Flanking |
|---------|-------|----------|-------------|------------------|-------------|
| Ch      | 732   | 2.46e-10 | TGCCCATATT  | CGCATTCCGGTGTAG  | TCATCTTGTT  |
| Cm      | 973   | 3.13e-08 | TGTCCATGTT  | CACATTCAAGTGTGCG | CAATTTTCCA  |
| Lc      | 1368  | 5.83e-08 | AATTCACCTTA | CTGATTCCGGTGTAG  | TTTTGTATAA  |
| Ls      | 1025  | 3.49e-07 | TAACACATAA  | GACACCCGCTATAG   | TGTTGAATTT  |

#### Motif 18

| Species | Start | P-value  | 5' Flanking | MEME Motif    | 3' Flanking |
|---------|-------|----------|-------------|---------------|-------------|
| Ch      | 555   | 4.60e-08 | TTGATATAAA  | CCTTATTCCAGGG | TACTAAAGAT  |
| Lc      | 1687  | 6.14e-08 | TTTAAATCTT  | CCTATTTCAATGG | AATAGAAAAA  |
| Ls      | 1323  | 6.14e-08 | GTAAATCTT   | CCTATTTCAATGG | AATACAAAAA  |
| Cm      | 798   | 3.17e-07 | TTGATATAAA  | TCTAATTCCAAGG | TACTGAAGAA  |

#### Motif 19

| Species | Start | P-value  | 5' Flanking | MEME Motif | 3' Flanking |
|---------|-------|----------|-------------|------------|-------------|
| Cm      | 3336  | 9.42e-08 | AACGACAGAC  | AGGGAGGCGG | TTATACGAAT  |
| Lc      | 450   | 1.08e-06 | CTTTGACGAA  | TGCCTGGCTG | TGGCTAAGAA  |
| Ch      | 1630  | 1.08e-06 | CATAGGAAAC  | AGCTTGGCGG | CAAACCTTTG  |
| Ls      | 1590  | 8.41e-06 | TACAAAAGTA  | TGGAAGTCTG | AATGAACGAA  |

#### Motif 20

| Species | Start | P-value  | 5' Flanking | MEME Motif | 3' Flanking |
|---------|-------|----------|-------------|------------|-------------|
| Ch      | 1507  | 2.47e-07 | GACCAATGAG  | CTAACCGGGC | TTTTCTACCT  |
| Cm      | 3032  | 9.01e-07 | TCAAAGATTC  | CTAACCCAGC | CACTTAAAAT  |
| Ls      | 200   | 9.01e-07 | GGAAAAAGTA  | TTAACCCGCC | GATTAAGTAT  |
| Lc      | 1926  | 1.29e-06 | CAACATTACC  | TTAACTCGGC | AGCAATATGG  |
